# Supplementary material for: Maximizing Interpretability and Cost-Effectiveness of Surgical Site Infection (SSI) Predictive Models Using Feature-Specific Regularized Logistic Regression on Preoperative Temporal Data
Source: Hindawi journal article supplement (doi:10.1155/2019/2059851), 2019-02-19
Supplement: f1 [file 2059851.f1.pdf]

Kocbek et al. Maximizing interpretability and cost-effectiveness of Surgical Site Infection (SSI) predictive models using feature-specific regularized logistic regression on preoperative temporal data. *Computational and Mathematical Methods in Medicine*, 2019.

## Supplementary Materials

Table S1: Blood test prices for 14 most frequent tests over a 30-day period before surgery

| <b>Blood test</b> | <b>Price [Norwegian krone]</b> |
|-------------------|--------------------------------|
| Hemoglobin*       | 16.39                          |
| Leukocytes*       |                                |
| Trombocytes*      |                                |
| Amylase           | 13.72                          |
| CRP               | 10.94                          |
| Albumin           | 7.22                           |
| Kreatinin         | 7.16                           |
| Glukose           | 6.99                           |
| Bilirubin         | 6.63                           |
| ASAT              | 6.58                           |
| ALAT              | 6.55                           |
| ALP               | 6.38                           |
| Natrium           | 6.33                           |
| Kalium            | 6.22                           |

\*all 3 results obtained with Hematology Analyser
